# Supplementary material
Source: PubMed Central journal article supplement (PMC7279714)
Supplement: NIHMS1585668-supplement-1.pdf [file NIHMS1585668-supplement-1.pdf]

---

**SUPPLEMENTARY MATERIAL FOR:**

**Circadian Rhythms in the Pathogenesis and Treatment of Fatty Liver Disease**

Anand R. Saran<sup>1</sup> (post-doctoral fellow), Shravan Dave<sup>1</sup> (gastroenterology and hepatology fellow) Amir Zarrinpar<sup>1,2,3,4,\*</sup> (assistant professor of gastroenterology and hepatology)

**Supplementary Figure 1: The Gut Microbiome and Peripheral Circadian Rhythms.** The gut microbiome can modulate peripheral circadian rhythms through several known mechanisms. It can do so through secondary metabolites such as short chain fatty acids and bile acids, and/or directly through TLRs.

Journal Pre-proof

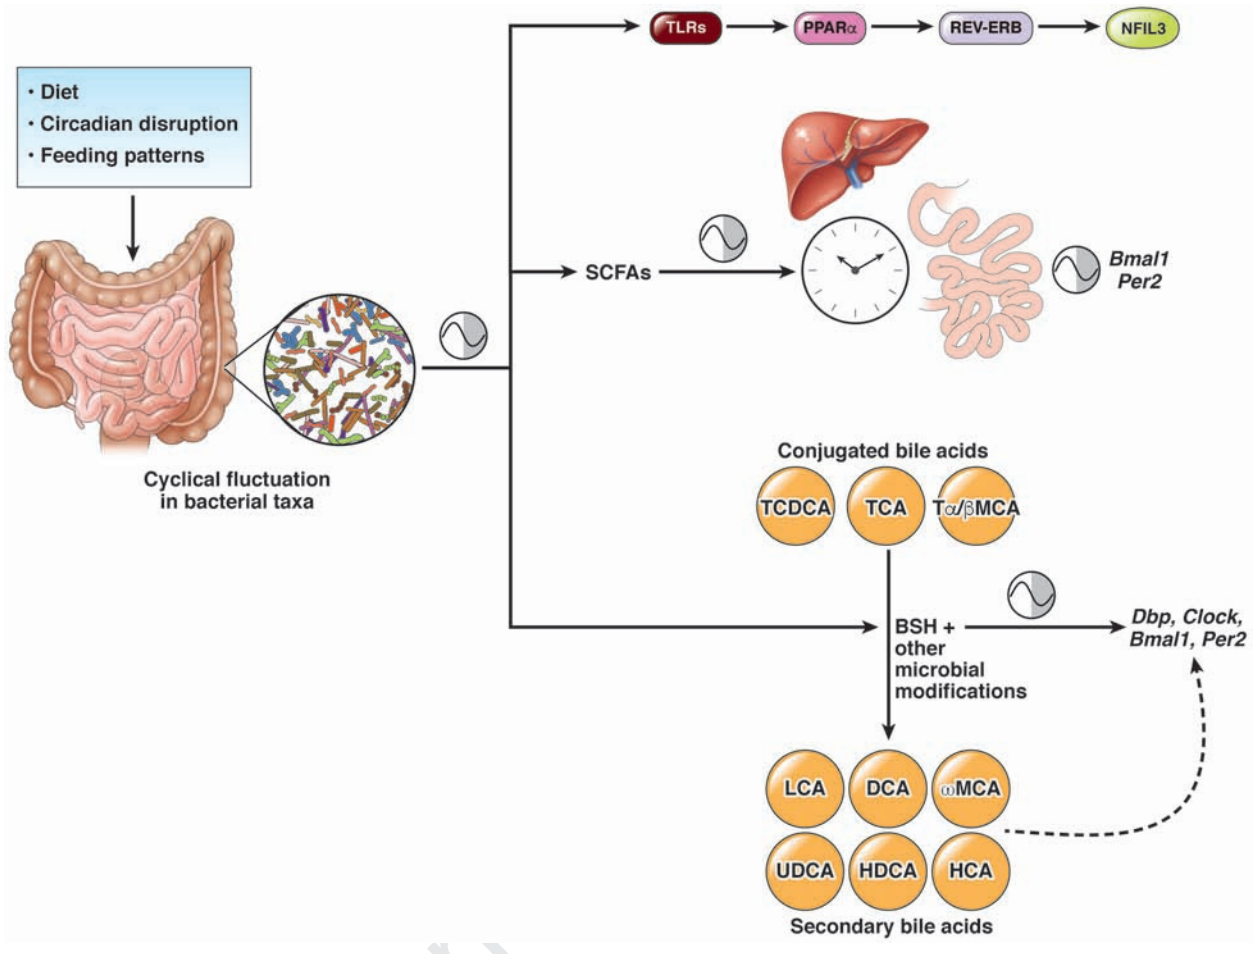

Jour
